# Supplementary material for: Syntheses, structures and magnetic properties of two isostructural dicyanamide-bridged 2D polymers
Source: Royal Society of Chemistry journal article supplement (doi:10.1039/d1nj00726b), 2021-01-01
Supplement: d1nj00726b1.pdf [file d1nj00726b1.pdf]

## Electronic supplementary information

### Syntheses, structures and magnetic properties in two isostructural dicyanamide-bridged 2D polymers †

Andrii Kliuikov<sup>a</sup>, Oleksandr Bukrynov<sup>b</sup>, Erik Čižmár<sup>a</sup>, Lucia Váhovská<sup>c</sup>, Svitlana Vitushkina<sup>b</sup>, Erika Samoľová<sup>d</sup>, Ivan Potočňák<sup>e\*</sup>

<sup>a</sup> *P. J. Šafárik University in Košice, Faculty of Science, Institute of Physics, Park Angelinum 9, SK-041 54 Košice, Slovakia*

<sup>b</sup> *V.N. Karazin Kharkiv National University, Faculty of Chemistry, Department of Applied Chemistry, Svobody sq. 4, UA-61022 Kharkiv, Ukraine*

<sup>c</sup> *University of Veterinary Medicine and Pharmacy in Košice, Department of Chemistry, Biochemistry and Biophysics, Komenského 73, SK-041 84 Košice, Slovakia*

<sup>d</sup> *Institute of Physics of the Czech Academy of Sciences, Na Slovance 2, 182 21 Prague 8, Czech Republic*

<sup>e</sup> *P. J. Šafárik University in Košice, Faculty of Science, Institute of Chemistry, Department of Inorganic Chemistry, Moyzesova 11, SK-041 54 Košice, Slovakia*

---

† Low-dimensional compounds containing cyanido groups. Part XXXVI.

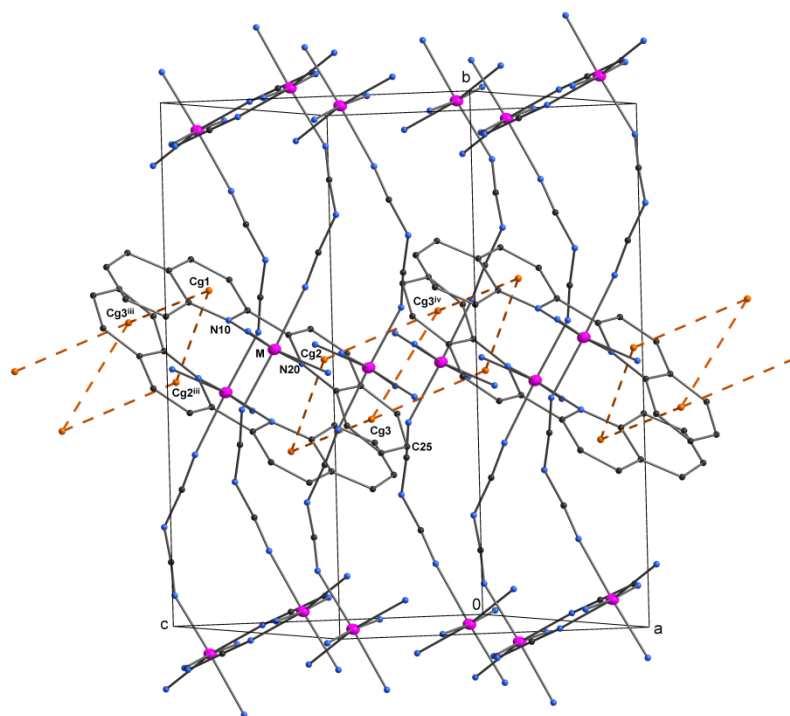

**Fig S1**  $\pi$ - $\pi$  interactions (orange dashed lines) between aromatic rings in **1** and **2**. Hydrogen atoms not involved in hydrogen bonds are omitted for clarity.

Symmetry codes: iii =  $-x, 1 - y, 1 - z$ ; iv =  $1 - x, 1 - y, 1 - z$ .

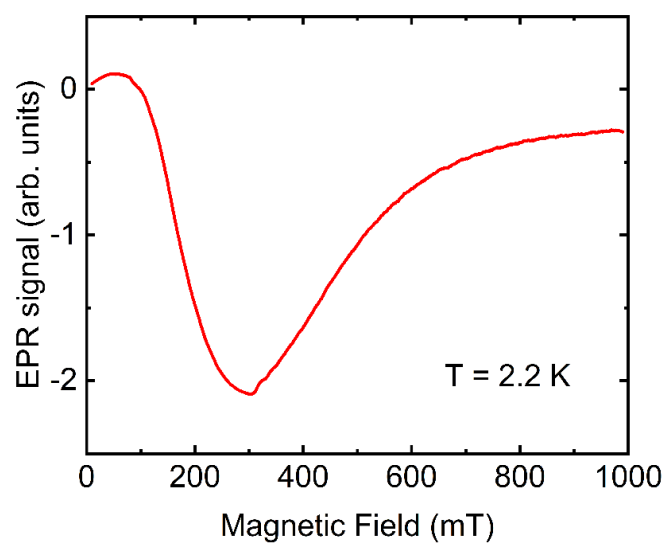

**Fig. S2** X-band EPR spectrum of **1** measured at 2.2 K.

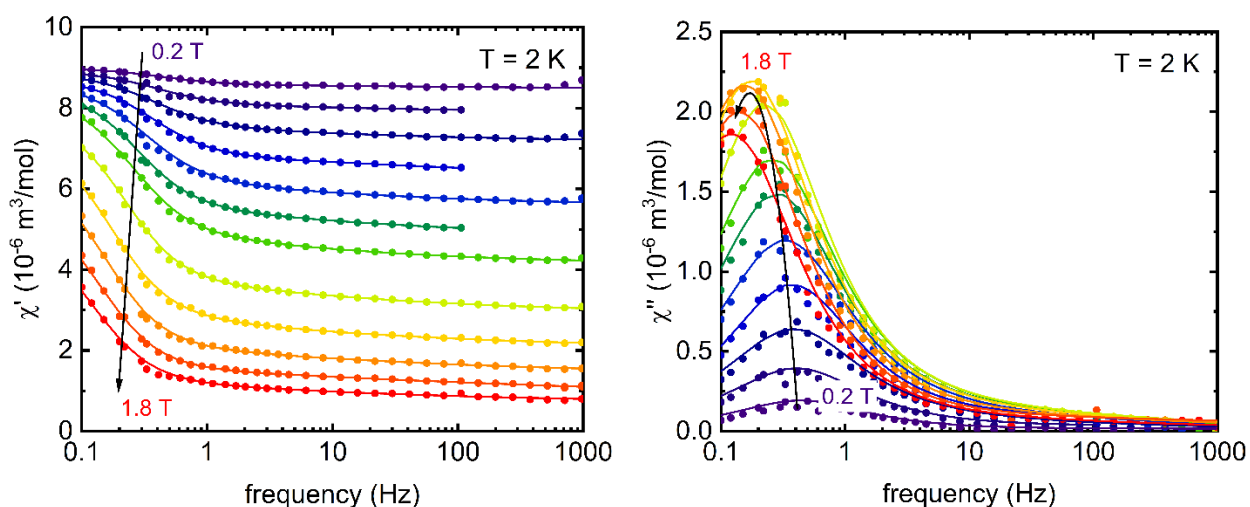

**Fig. S3** Frequency dependence of real (left panel) and imaginary (right panel) component of AC susceptibility of **1** measured at different applied DC fields measured at 2 K including the fit of the modified Debye model (an additional Debye function was included to take into account a very small contribution at higher frequencies).

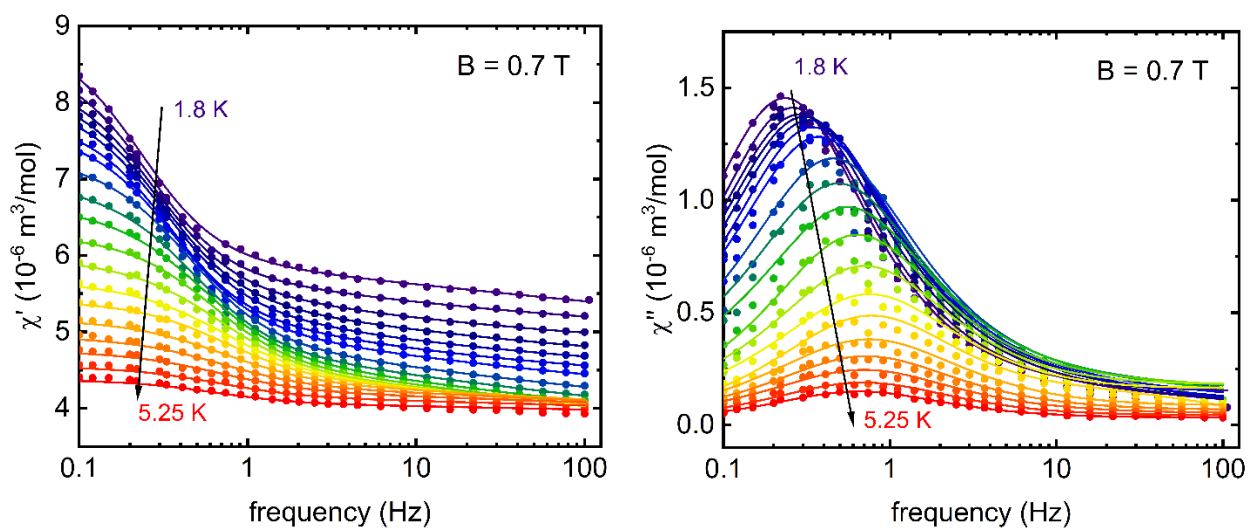

**Fig. S4** Frequency dependence of real (left panel) and imaginary (right panel) component of AC susceptibility of **1** measured at an applied DC field 0.7 T in the temperature range 1.8 - 5.25 K including the fit of the modified Debye model (an additional Debye function was included to take into account a very small contribution at higher frequencies).

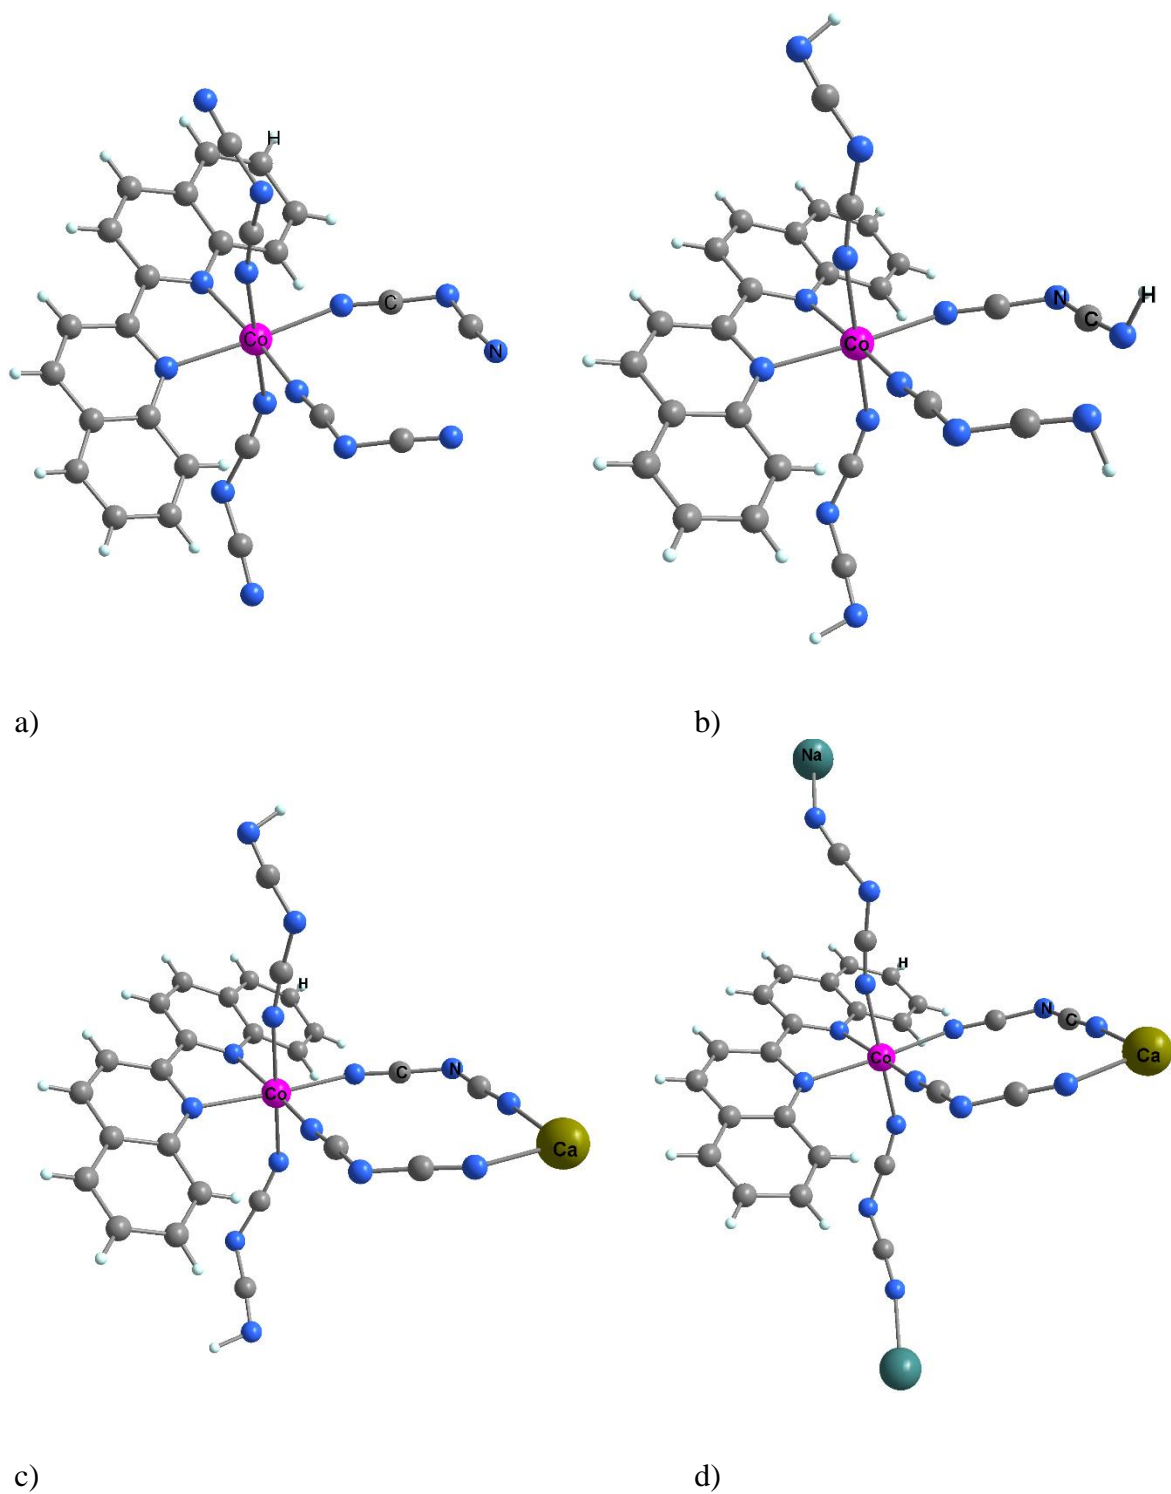

**Fig. S5** Structure of all fragments used for the SA-CASSCF/NEVPT2 calculations of ZFS parameters in compound **1**, a)  $[\text{Co}(\text{biq})(\text{dca})_4]^{2-}$ , b)  $[\text{Co}(\text{biq})(\mu_{1,5}\text{-dca})_4\text{H}_4]^{2+}$ , c)  $[\text{Co}(\text{biq})(\mu_{1,5}\text{-dca})_4\text{H}_2\text{Ca}]^{2+}$ , d)  $[\text{Co}(\text{biq})(\mu_{1,5}\text{-dca})_4\text{Na}_2\text{Ca}]^{2+}$ , the same type of fragments was used for compound **2**.

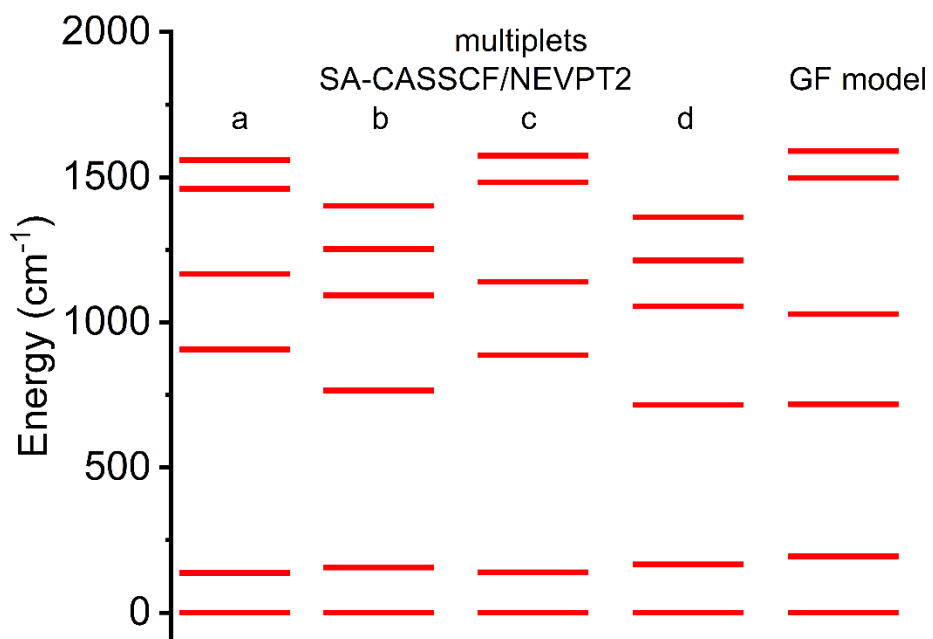

**Fig. S6** The energies of 6 lowest multiplets as obtained from SA-CASSCF/NEVPT2 calculations for: a)  $[\text{Co}(\text{biq})(\text{dca})_4]^{2-}$ , b)  $[\text{Co}(\text{biq})(\mu_{1,5}\text{-dca})_4\text{H}_4]^{2+}$ , c)  $[\text{Co}(\text{biq})(\mu_{1,5}\text{-dca})_4\text{H}_2\text{Ca}]^{2+}$ , d)  $[\text{Co}(\text{biq})(\mu_{1,5}\text{-dca})_4\text{Na}_2\text{Ca}]^{2+}$ . Energies obtained using Griffith-Figgis (GF) Hamiltonian Eq. 3 with the set of the parameters obtained from the fit of  $\mu_{\text{eff}}(\text{T})$  are included.

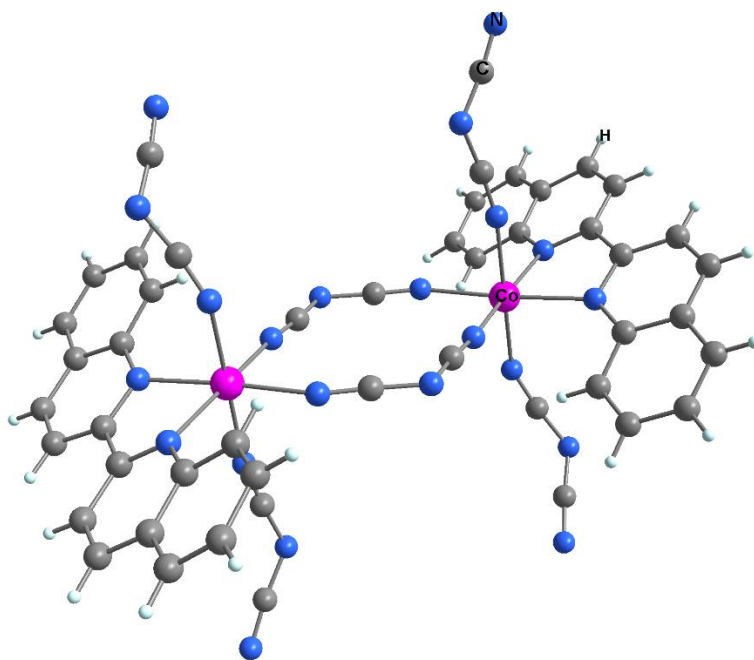

a)

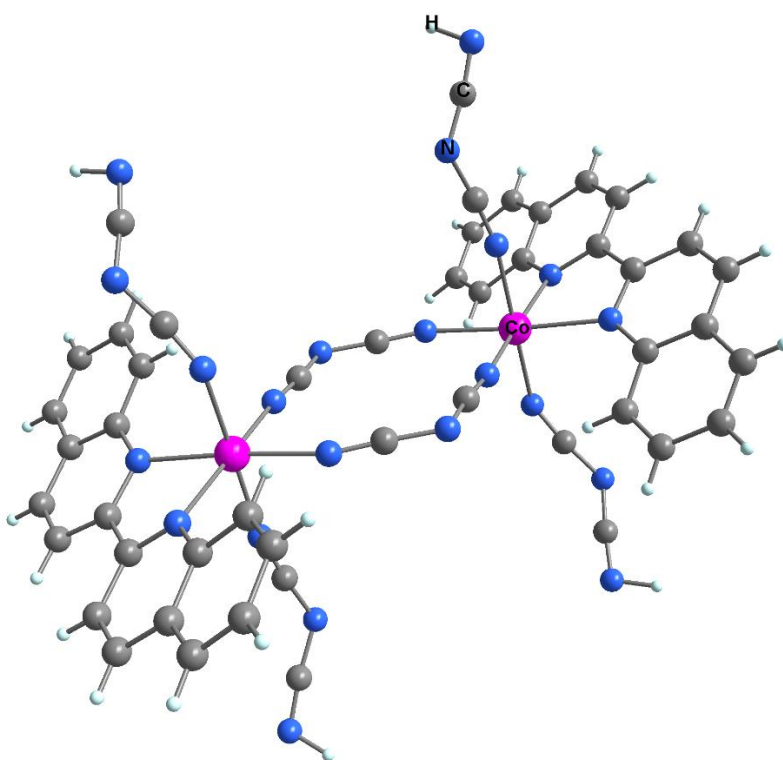

b)

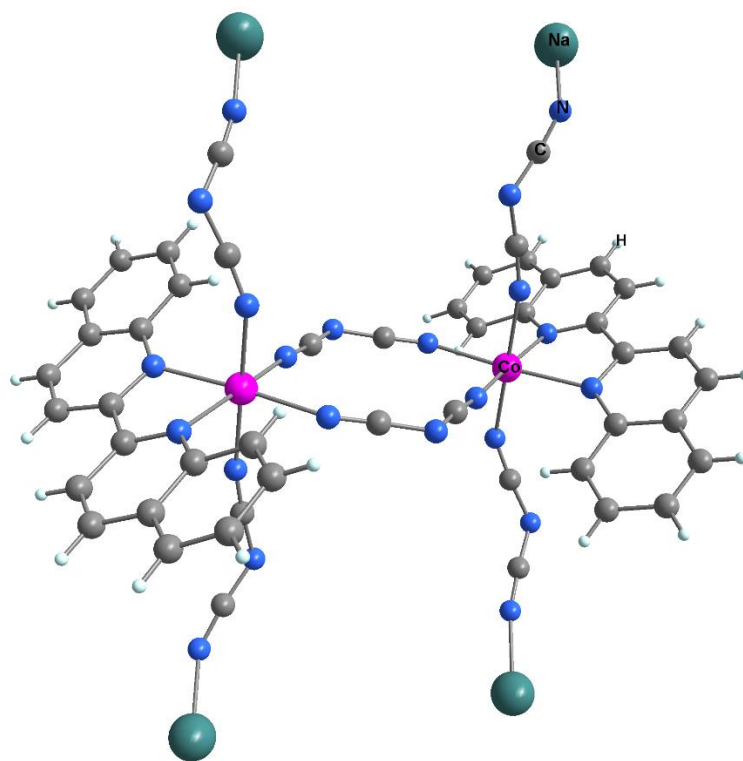

c)

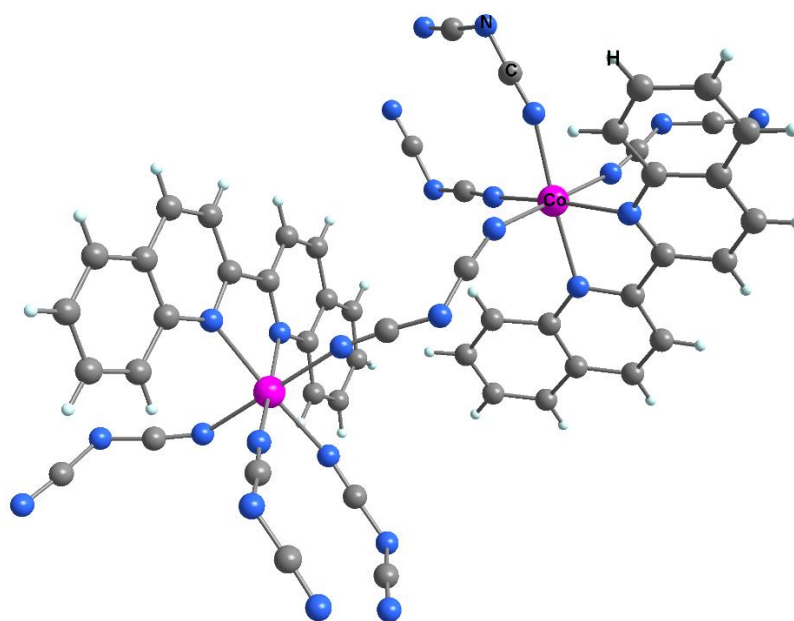

d)

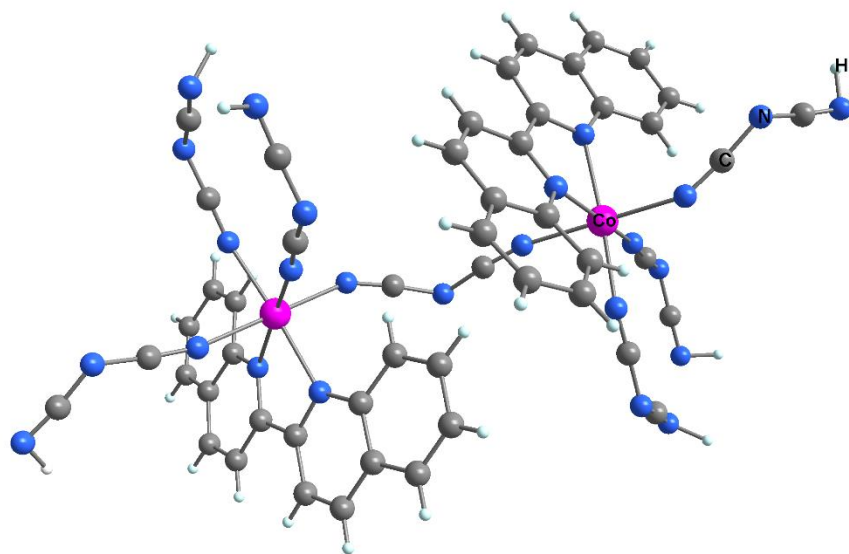

e)

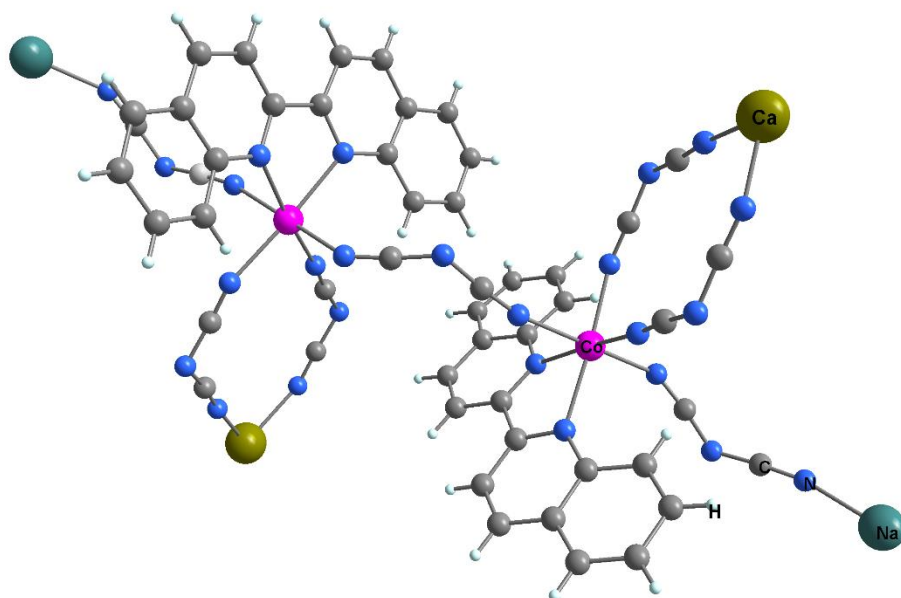

f)

**Fig. S7** Structure of all fragments used for the BS DFT calculations of two different exchange paths in compound **1**, a)  $[\text{Co}(\text{biq})(\text{dca})_2-(\mu_{1,5}\text{-dca})_2\text{-Co}(\text{biq})(\text{dca})_2]^{2-}$ , b)  $[\text{Co}(\text{biq})(\mu_{1,5}\text{-dca})_2\text{H}_2-(\mu_{1,5}\text{-dca})_2\text{-Co}(\text{biq})(\mu_{1,5}\text{-dca})_2\text{H}_2]^{2+}$ , c)  $[\text{Co}(\text{biq})(\mu_{1,5}\text{-dca})_2\text{Na}_2-(\mu_{1,5}\text{-dca})_2\text{-Co}(\text{biq})(\mu_{1,5}\text{-dca})_2\text{Na}_2]^{2+}$ , d)  $[(\text{dca})\text{-Co}(\text{biq})(\text{dca})_2-(\mu_{1,5}\text{-dca})\text{-Co}(\text{biq})(\text{dca})_2-(\text{dca})]^{3-}$ , e)  $[\text{H}(\mu_{1,5}\text{-dca})\text{-Co}(\text{biq})(\mu_{1,5}\text{-dca})_2\text{H}_2-(\mu_{1,5}\text{-dca})\text{-Co}(\text{biq})(\mu_{1,5}\text{-dca})_2\text{H}_2-(\mu_{1,5}\text{-dca})\text{H}]^{3+}$ , f)  $[\text{Na}(\mu_{1,5}\text{-dca})\text{-Co}(\text{biq})(\mu_{1,5}\text{-dca})_2\text{Ca}-(\mu_{1,5}\text{-dca})\text{-Co}(\text{biq})(\mu_{1,5}\text{-dca})_2\text{Ca}-(\mu_{1,5}\text{-dca})\text{Na}]^{3+}$ , the same type of fragments was used for compound **2**.



**Table S1** Comparison of magnetic parameters of other dca bridged polymeric complexes showing slow magnetic relaxation.

| Compound                                                                                                 | $U_{\text{eff}}/\text{cm}^{-1}$<br>(applied field/T) | $\tau_0/s$                                                  | magnetic interactions            | Ref.              |
|----------------------------------------------------------------------------------------------------------|------------------------------------------------------|-------------------------------------------------------------|----------------------------------|-------------------|
| $[\text{Co}(\text{atz})_2(\text{dca})_2]_n$<br>easy-axis anisotropy                                      | 5.1 (0.1)                                            | $1.7 \times 10^{-6}$                                        | neglected                        | Palion-Gazda 2015 |
| $[\text{Co}(\text{dca})_2(\text{NH}_2\text{pyz})_2]_n \cdot \text{H}_2\text{O}$<br>easy-plane anisotropy | 24.5 – 28.2<br>(0.25)<br>1.62 – 2.37                 | $1.19 – 2.5 \times 10^{-7}$<br>$3.0 – 5.7 \times 10^{-5}$   | neglected                        | Palion-Gazda 2019 |
| $[\text{Co}_3(\text{dca})_6(\text{HOPyz})_5(\text{H}_2\text{O})_2]_n$<br>easy-plane anisotropy           | 11.6 – 20.1<br>(0.2)<br>0.33 – 1.26                  | $1.73 – 14.1 \times 10^{-7}$<br>$1.96 – 4.3 \times 10^{-5}$ | $zJ = -0.3 \text{ cm}^{-1}$      | Palion-Gazda 2019 |
| $[\text{Co}(\text{bim})_2(\text{dca})_2]_n$<br>easy-axis anisotropy                                      | 5.33 (0.1)                                           | $1.54 \times 10^{-6}$                                       | neglected                        | Switliczka 2016   |
| $[\text{Co}(\text{bmim})_2(\text{dca})_2]_n$<br>easy-axis anisotropy                                     | 13.81 (0.1)                                          | $0.63 \times 10^{-6}$                                       | $\Theta = -0.07 \text{ cm}^{-1}$ | Switliczka 2016   |
| $[\text{Co}(\text{pypz})(\text{dca})(\text{H}_2\text{O})]_n \cdot (\text{dca})$<br>easy-axis anisotropy  | 103 (0.4)                                            | $1.2 \times 10^{-11}$                                       | $zJ = -0.006 \text{ cm}^{-1}$    | Switlicka 2020    |

*atz* = 2-amino-1,3,5- triazine; *pyz* = pyrazine; *bim* = 1-benzylimidazole; *bmim* = 1-benzyl-2-methylimidazole; *pypz* = 2,6-bis(pyrazol-1-yl)pyridine

J. Palion-Gazda, T. Klemens, B. Machura, J. Vallejo, F. Lloret and M. Julve, *Dalton Trans.*, 2015, **44**, 2989-2992.

J. Palion-Gazda, K. Choroba, B. Machura, A. Świtlicka, R. Kruszynski, J. Cano, F. Lloret and M. Julve, *Dalton Trans.*, 2019, **48**, 17266-17280.

A. Świtlicka-Olszewska, J. Palion-Gazda, T. Klemens, B. Machura, J. Vallejo, J. Cano, F. Lloret, M. Julve, *Dalton Trans.*, 2016, **45**, 10181–10193.

A. Świtlicka, B. Machura, M. Penkala, A. Bieńko, D. C. Bieńko, J. Titiš, C. Rajnák, R. Boča, A. Ozarowski, *Inorg. Chem. Front.*, 2020, **7**, 2637-2650.

**Table S2** The energies (in  $\text{cm}^{-1}$ ) of 6 lowest multiplets as obtained from SA-CASSCF/NEVPT2 calculations for: a)  $[\text{Co}(\text{biq})(\text{dca})_4]^{2+}$ , b)  $[\text{Co}(\text{biq})(\mu_{1,5}\text{-dca})_4\text{H}_4]^{2+}$ , c)  $[\text{Co}(\text{biq})(\mu_{1,5}\text{-dca})_4\text{H}_2\text{Ca}]^{2+}$ , d)  $[\text{Co}(\text{biq})(\mu_{1,5}\text{-dca})_4\text{Na}_2\text{Ca}]^{2+}$ . Energies obtained using GF Hamiltonian Eq. 3 with the set of the parameters obtained from the fit of the  $\mu_{\text{eff}}(\text{T})$  are included.

| multiplet | a      | b      | c      | d      | GF model |
|-----------|--------|--------|--------|--------|----------|
| 1         | 0      | 0      | 0      | 0      | 0        |
| 2         | 137.5  | 155.8  | 166.7  | 139.4  | 193.8    |
| 3         | 906.9  | 765.2  | 716.1  | 887.2  | 717.8    |
| 4         | 1166.9 | 1093.4 | 1055.8 | 1140.0 | 1028.8   |
| 5         | 1460.2 | 1252.4 | 1214.1 | 1482.8 | 1497.1   |
| 6         | 1558.9 | 1401.0 | 1361.9 | 1574.4 | 1590.1   |

**Table S3** Comparison of the exchange coupling  $J_{BS1}$  and  $J_{BS2}$  in **1** obtained from BS DFT calculations for different binuclear model fragments of the polymeric structure.

|                                                                                                                                                                                                                                     | B3LYP                         | TPSSh | PBE0  |
|-------------------------------------------------------------------------------------------------------------------------------------------------------------------------------------------------------------------------------------|-------------------------------|-------|-------|
|                                                                                                                                                                                                                                     | $J_{BS1}$ (cm <sup>-1</sup> ) |       |       |
| [Co( <i>biq</i> )(dca) <sub>2</sub> -(μ <sub>1,5</sub> -dca) <sub>2</sub> -Co( <i>biq</i> )(dca) <sub>2</sub> ] <sup>2-</sup>                                                                                                       | -0.44                         | -0.59 | -0.46 |
| [Co( <i>biq</i> )(μ <sub>1,5</sub> -dca) <sub>2</sub> H <sub>2</sub> -(μ <sub>1,5</sub> -dca) <sub>2</sub> -Co( <i>biq</i> )(μ <sub>1,5</sub> -dca) <sub>2</sub> H <sub>2</sub> ] <sup>2+</sup>                                     | -0.36                         | -1.03 | -0.41 |
| [Co( <i>biq</i> )(μ <sub>1,5</sub> -dca) <sub>2</sub> Na <sub>2</sub> -(μ <sub>1,5</sub> -dca) <sub>2</sub> -Co( <i>biq</i> )(μ <sub>1,5</sub> -dca) <sub>2</sub> Na <sub>2</sub> ] <sup>2+</sup>                                   | -0.60                         | -1.12 | -0.91 |
|                                                                                                                                                                                                                                     | $J_{BS2}$ (cm <sup>-1</sup> ) |       |       |
| [(dca)-Co( <i>biq</i> )(dca) <sub>2</sub> -(μ <sub>1,5</sub> -dca)-Co( <i>biq</i> )(dca) <sub>2</sub> -(dca)] <sup>3-</sup>                                                                                                         | -0.34                         | -0.49 | -0.45 |
| [H(μ <sub>1,5</sub> -dca)-Co( <i>biq</i> )(μ <sub>1,5</sub> -dca) <sub>2</sub> H <sub>2</sub> -(μ <sub>1,5</sub> -dca)-Co( <i>biq</i> )(μ <sub>1,5</sub> -dca) <sub>2</sub> H <sub>2</sub> -(μ <sub>1,5</sub> -dca)H] <sup>3+</sup> | -0.56                         | -0.84 | -0.40 |
| [Na(μ <sub>1,5</sub> -dca)-Co( <i>biq</i> )(μ <sub>1,5</sub> -dca) <sub>2</sub> Ca-(μ <sub>1,5</sub> -dca)-Co( <i>biq</i> )(μ <sub>1,5</sub> -dca) <sub>2</sub> Ca-(μ <sub>1,5</sub> -dca)Na] <sup>3+</sup>                         | -0.46                         | -0.71 | -0.40 |

**Table S4** Comparison of the exchange coupling  $J_{BS1}$  and  $J_{BS2}$  in **2** obtained from BS DFT calculations for different binuclear model fragments of the polymeric structure.

|                                                                                                                                                                                                                                     | B3LYP                         | TPSSh | PBE0 |
|-------------------------------------------------------------------------------------------------------------------------------------------------------------------------------------------------------------------------------------|-------------------------------|-------|------|
|                                                                                                                                                                                                                                     | $J_{BS1}$ (cm <sup>-1</sup> ) |       |      |
| [Ni( <i>biq</i> )(dca) <sub>2</sub> -(μ <sub>1,5</sub> -dca) <sub>2</sub> -Ni( <i>biq</i> )(dca) <sub>2</sub> ] <sup>2-</sup>                                                                                                       | -0.70                         | -1.00 | 0.06 |
| [Ni( <i>biq</i> )(μ <sub>1,5</sub> -dca) <sub>2</sub> H <sub>2</sub> -(μ <sub>1,5</sub> -dca) <sub>2</sub> -Ni( <i>biq</i> )(μ <sub>1,5</sub> -dca) <sub>2</sub> H <sub>2</sub> ] <sup>2+</sup>                                     | -0.48                         | -0.41 | 0.31 |
| [Ni( <i>biq</i> )(μ <sub>1,5</sub> -dca) <sub>2</sub> Na <sub>2</sub> -(μ <sub>1,5</sub> -dca) <sub>2</sub> -Ni( <i>biq</i> )(μ <sub>1,5</sub> -dca) <sub>2</sub> Na <sub>2</sub> ] <sup>2+</sup>                                   | 0.15                          | -0.46 | 0.33 |
|                                                                                                                                                                                                                                     | $J_{BS2}$ (cm <sup>-1</sup> ) |       |      |
| [(dca)-Ni( <i>biq</i> )(dca) <sub>2</sub> -(μ <sub>1,5</sub> -dca)-Ni( <i>biq</i> )(dca) <sub>2</sub> -(dca)] <sup>3-</sup>                                                                                                         | 0.36                          | 0.53  | 1.05 |
| [H(μ <sub>1,5</sub> -dca)-Ni( <i>biq</i> )(μ <sub>1,5</sub> -dca) <sub>2</sub> H <sub>2</sub> -(μ <sub>1,5</sub> -dca)-Ni( <i>biq</i> )(μ <sub>1,5</sub> -dca) <sub>2</sub> H <sub>2</sub> -(μ <sub>1,5</sub> -dca)H] <sup>3+</sup> | 0.45                          | 0.65  | 1.11 |
| [Na(μ <sub>1,5</sub> -dca)-Ni( <i>biq</i> )(μ <sub>1,5</sub> -dca) <sub>2</sub> Ca-(μ <sub>1,5</sub> -dca)-Ni( <i>biq</i> )(μ <sub>1,5</sub> -dca) <sub>2</sub> Ca-(μ <sub>1,5</sub> -dca)Na] <sup>3+</sup>                         | 0.38                          | 0.57  | 1.22 |
